# Supplementary material
Source: HighWire-hosted journal article supplement (https://bmjopen.bmj.com/content/7/9/e016062)
Supplement: inline-supplementary-material-1 [file inline-supplementary-material-1.pdf]

**Supplement 1.** Morbidities of MetS and its components during follow-up.

|                 | Male    |          |              | Female  |          |              | <i>P</i> |
|-----------------|---------|----------|--------------|---------|----------|--------------|----------|
|                 | Free, n | Newly, n | Morbidity, % | Free, n | Newly, n | Morbidity, % |          |
| MetS            | 69      | 42       | 37.8         | 108     | 34       | 23.9         | 0.017    |
| Central obesity | 57      | 31       | 35.2         | 86      | 30       | 25.9         | 0.148    |
| High TG         | 80      | 19       | 19.2         | 119     | 11       | 8.5          | 0.017    |
| Low HDL         | 148     | 16       | 9.8          | 119     | 11       | 8.5          | 0.703    |
| High BP         | 28      | 59       | 67.8         | 51      | 82       | 61.7         | 0.352    |
| High BG         | 76      | 25       | 24.8         | 102     | 17       | 14.3         | 0.049    |

TG, triglyceride; HDL, high density lipoprotein cholesterol; BP, blood pressure; BG, blood glucose.
